# Supplementary material for: Using chiral ammonium cations to modulate the structure of 1D hybrid lead bromide perovskites for linearly polarized broadband light emission at room temperature
Source: Royal Society of Chemistry journal article supplement (doi:10.1039/d2tc02040h), 2022-01-01
Supplement: d2tc02040h1.pdf [file d2tc02040h1.pdf]

ELECTRONIC SUPPLEMENTARY INFORMATION

## Using chiral ammonium cations to modulate the structure of 1D hybrid lead bromide perovskites for linearly polarized broadband light emission at room temperature

Joanna M. Urban, Abdelaziz Jouaiti, Nathalie Gruber, Géraud Delport, Gaëlle Trippé-Allard, Jean-François Guillemoles, Emmanuelle Deleporte, Sylvie Ferlay and Damien Garrot

### XRPD measurements

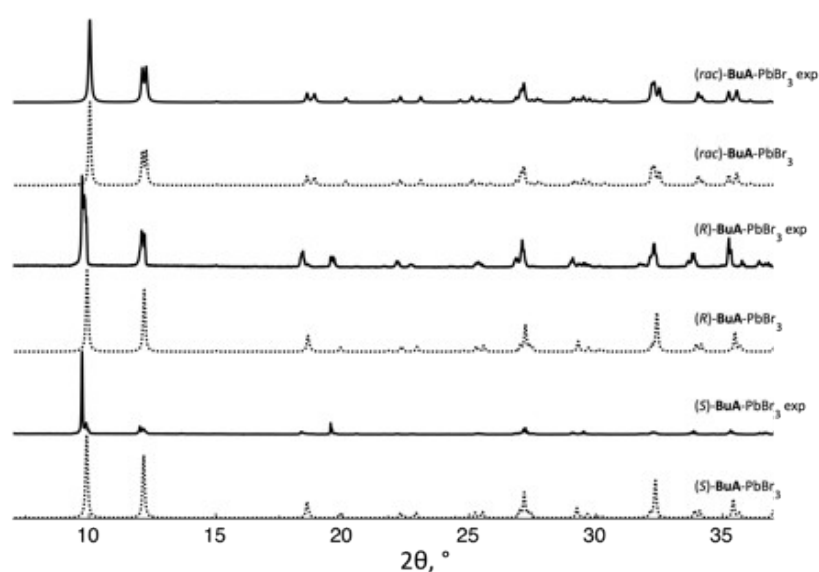

BUA-PbBr<sub>3</sub>

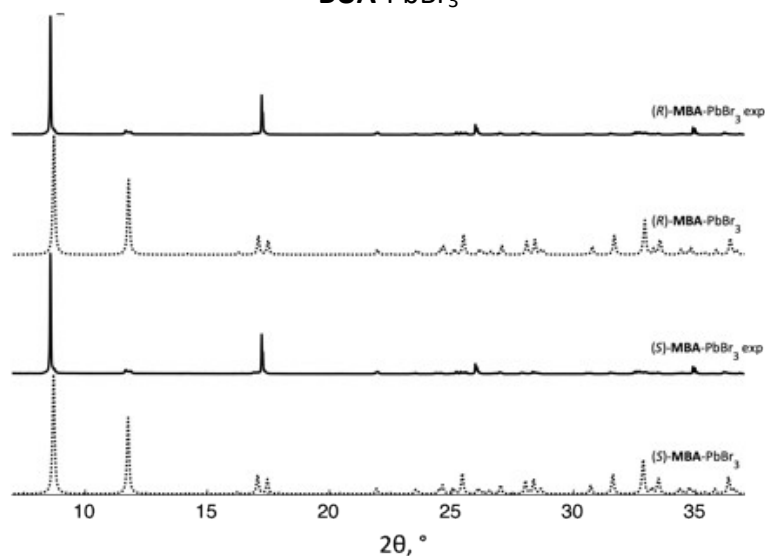

MBAH-PbBr<sub>3</sub>

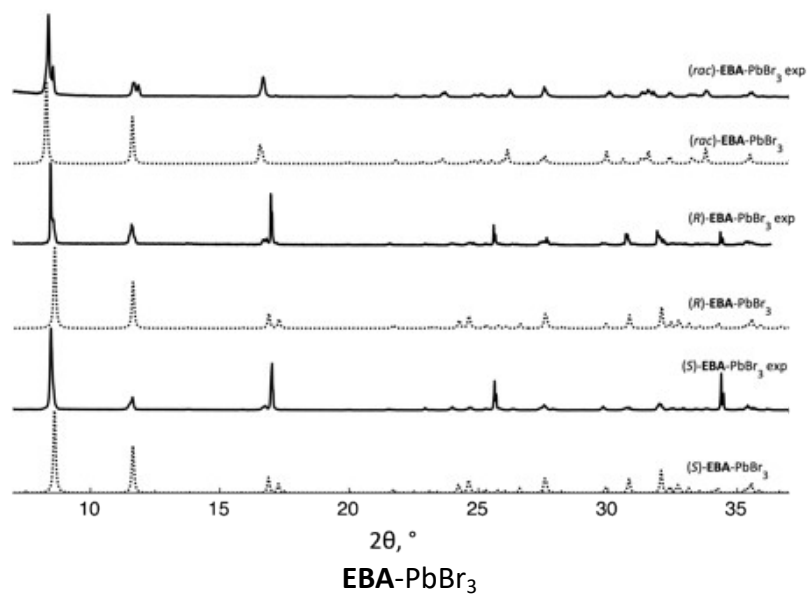

**Figure S1:** For (*S*), (*R*) and (*rac*)-**BUA**-PbBr<sub>3</sub>, (*S*), (*R*) **MBAH**-PbBr<sub>3</sub> and (*S*), (*R*) and (*rac*)-**EBA**-PbBr<sub>3</sub>, comparison of the simulated and experimental powder X-Ray diffraction studies (PXRD) diagrams

### Optical absorption spectra

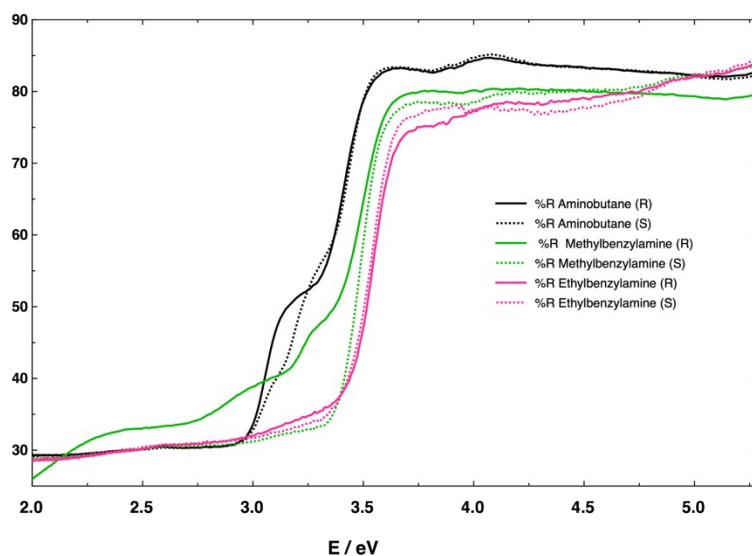

**Figure S2:** UV-vis diffuse reflectance spectra of the polycrystalline samples of (*S*)-**BuA**-PbBr<sub>3</sub>, (*S*)-**MBA**-PbBr<sub>3</sub>, (*S*)-**EBA**-PbBr<sub>3</sub>, (*R*)-**BuA**-PbBr<sub>3</sub>, (*R*)-**MBA**-PbBr<sub>3</sub>, and (*R*)-**EBA**-PbBr<sub>3</sub>

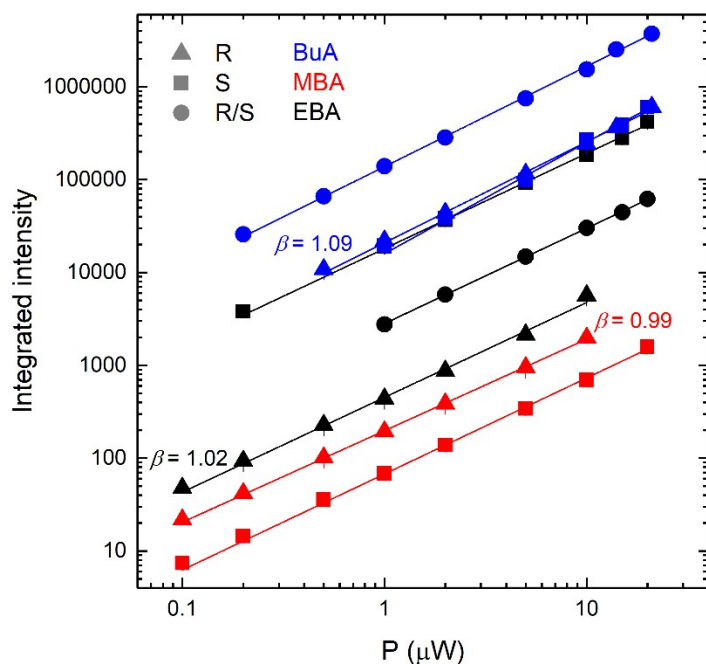

**Figure S3:** Integrated intensity of the broad emission peak as a function of the 3.06 eV excitation power for the massive crystal samples. The experimental data is marked in blue (**BuA**-PbBr<sub>3</sub>), red (**MBA**-PbBr<sub>3</sub>) and black (**EBA**-PbBr<sub>3</sub>) circles (racemic mix), triangles (*R* enantiomer) and squares (*S* enantiomer). The lines show the fit of the power law  $I = aP^\beta$ , the coefficients  $\beta$  are marked for the three *R*-enantiomer samples. For the pure enantiomers the coefficients obtained were 1.09 and 1.20 (**BuA**-PbBr<sub>3</sub>), 0.99 and 1.03 (**MBA**-PbBr<sub>3</sub>), and 1.02 and 1.03 (**EBA**-PbBr<sub>3</sub>) for *R* and *S* enantiomers, respectively.

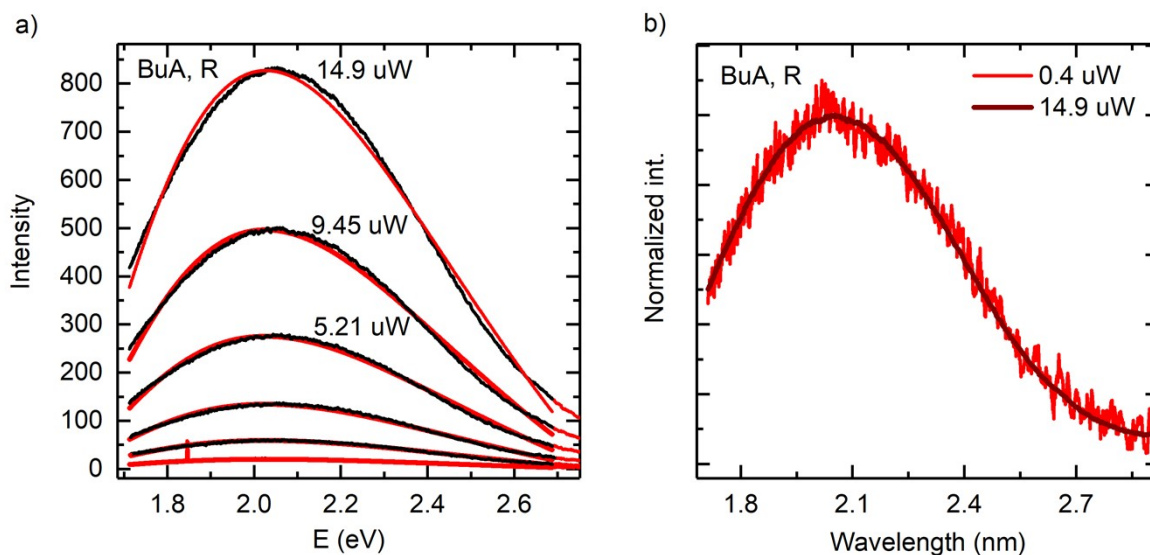

**Figure S4:** a) Photoluminescence spectra as a function of excitation power for the (*R*)-**BuA**-PbBr<sub>3</sub> compound for 405 nm (3.06 eV) excitation: spectra (black) and Gaussian fits (red) used to estimate the emission intensity. b) Normalized spectra at highest and lowest measured excitation power for the the (*R*)-**BuA**-PbBr<sub>3</sub> compound. No change of spectral shape is observed with increasing excitation power. Data is shown for one exemplary compound but the PL of the other compounds showed similar characteristics.

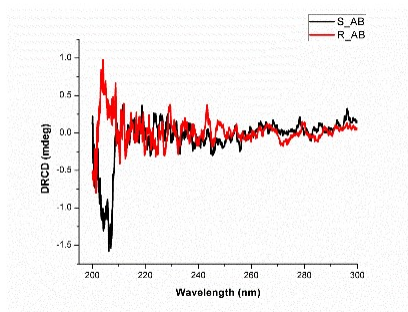

**BUA-PbBr<sub>3</sub>**

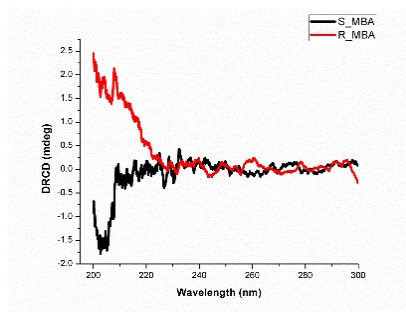

**MBAH-PbBr<sub>3</sub>**

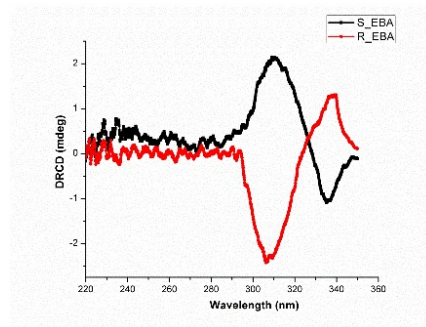

**EBA-PbBr<sub>3</sub>**

**Figure S5:** Circular dichroism (reflectance) of the polycrystalline samples of (S) and (R)-**BuA**-PbBr<sub>3</sub>, **MBA**-PbBr<sub>3</sub> and **EBA**-PbBr<sub>3</sub>

## X-Ray data

|                                                       | (S)-BuA-PbBr <sub>3</sub>                                                              | (R)-BuA-PbBr <sub>3</sub>                                                              | rac-BuA-PbBr <sub>3</sub>                            | (S)-MBA-PbBr <sub>3</sub> <sup>1</sup>                                                 | (R)-MBA-PbBr <sub>3</sub>                                                              | (S)-EBA-PbBr <sub>3</sub>                                                              | (R)-EBA-PbBr <sub>3</sub>                                                              | rac-EBA-PbBr <sub>3</sub>                                          |
|-------------------------------------------------------|----------------------------------------------------------------------------------------|----------------------------------------------------------------------------------------|------------------------------------------------------|----------------------------------------------------------------------------------------|----------------------------------------------------------------------------------------|----------------------------------------------------------------------------------------|----------------------------------------------------------------------------------------|--------------------------------------------------------------------|
| Formula                                               | PbBr <sub>3</sub> , C <sub>4</sub> H <sub>12</sub> N                                   | PbBr <sub>3</sub> , C <sub>4</sub> H <sub>12</sub> N                                   | PbBr <sub>3</sub> , C <sub>4</sub> H <sub>12</sub> N | PbBr <sub>3</sub> , C <sub>8</sub> H <sub>12</sub> N                                   | PbBr <sub>3</sub> , C <sub>8</sub> H <sub>12</sub> N                                   | PbBr <sub>3</sub> , C <sub>9</sub> H <sub>14</sub> N                                   | PbBr <sub>3</sub> , C <sub>9</sub> H <sub>14</sub> N                                   | Pb <sub>2</sub> Br <sub>6</sub> , C <sub>9</sub> H <sub>13</sub> N |
| Molecular weight (g mol <sup>-1</sup> )               | 521.07                                                                                 | 521.07                                                                                 | 521.07                                               | 569.11                                                                                 | 569.11                                                                                 | 583.13                                                                                 | 583.13                                                                                 | 582.12                                                             |
| Crystal system                                        | Orthorhombic                                                                           | Orthorhombic                                                                           | Monoclinic                                           | Orthorhombic                                                                           | Orthorhombic                                                                           | Orthorhombic                                                                           | Orthorhombic                                                                           | Orthorhombic                                                       |
| Space group                                           | <i>P</i> <sub>2</sub> <sub>1</sub> <sub>2</sub> <sub>1</sub> <sub>2</sub> <sub>1</sub> | <i>P</i> <sub>2</sub> <sub>1</sub> <sub>2</sub> <sub>1</sub> <sub>2</sub> <sub>1</sub> | <i>P</i> <sub>2</sub> <sub>1</sub> / <i>n</i>        | <i>P</i> <sub>2</sub> <sub>1</sub> <sub>2</sub> <sub>1</sub> <sub>2</sub> <sub>1</sub> | <i>P</i> <i>n</i> <i>m</i> <i>a</i>                                |
| a(Å)                                                  | 7.8629(6)                                                                              | 7.8483(3)                                                                              | 7.9713(7)                                            | 7.9016(5)                                                                              | 7.8860(4)                                                                              | 8.1770(4)                                                                              | 8.1743(4)                                                                              | 8.0192(7)                                                          |
| b(Å)                                                  | 7.9677(7)                                                                              | 7.9539(3) Å                                                                            | 7.9713(7)                                            | 8.0986(4)                                                                              | 8.0842(4)                                                                              | 8.2177(4)                                                                              | 8.2125(4)                                                                              | 8.1450(6)                                                          |
| c(Å)                                                  | 17.8420(13) Å                                                                          | 17.8105(8)                                                                             | 17.6232(13)                                          | 20.2960(12)                                                                            | 20.2617(9)                                                                             | 20.5239(10)                                                                            | 20.4992(12)                                                                            | 21.301(2)                                                          |
| α(deg)                                                | 90                                                                                     | 90                                                                                     | 90                                                   | 90                                                                                     | 90                                                                                     | 90                                                                                     | 90                                                                                     | 90                                                                 |
| β(deg)                                                | 90                                                                                     | 90                                                                                     | 90.932(4)                                            | 90                                                                                     | 90                                                                                     | 90                                                                                     | 90                                                                                     | 90                                                                 |
| γ(deg)                                                | 90                                                                                     | 90                                                                                     | 90                                                   | 90                                                                                     | 90                                                                                     | 90                                                                                     | 90                                                                                     | 90                                                                 |
| V(Å <sup>3</sup> )                                    | 1117.79(15)                                                                            | 1111.81(8)                                                                             | 1111.27(16)                                          | 1298.78(13)                                                                            | 1291.72(11)                                                                            | 1379.13(12)                                                                            | 1376.14(12)                                                                            | 1391.3(2)                                                          |
| Z                                                     | 4                                                                                      | 4                                                                                      | 4                                                    | 4                                                                                      | 4                                                                                      | 4                                                                                      | 4                                                                                      | 4                                                                  |
| Colour                                                | Colourless                                                                             | Colourless                                                                             | Colourless                                           | Colourless                                                                             | Colourless                                                                             | Colourless                                                                             | Colourless                                                                             | Colourless                                                         |
| Crystal dim (mm <sup>3</sup> )                        | 0.100 x 0.110 x 0.120                                                                  | 0.090 x 0.090 x 0.090                                                                  | 0.100 x 0.100 x 0.150                                | 0.100 x 0.100 x 0.110                                                                  | 0.080 x 0.080 x 0.100                                                                  | 0.100 x 0.110 x 0.110                                                                  | 0.100 x 0.120 x 0.120                                                                  | 0.090 x 0.120 x 0.130                                              |
| Dcalc (g cm <sup>-3</sup> )                           | 3.096                                                                                  | 3.113                                                                                  |                                                      | 2.910                                                                                  | 2.926                                                                                  | 2.808                                                                                  | 2.815                                                                                  | 2.779                                                              |
| F(000)                                                | 920                                                                                    | 920                                                                                    | 1524                                                 | 1016                                                                                   | 1016                                                                                   | 1048                                                                                   | 1048                                                                                   | 1044                                                               |
| μ (mm <sup>-1</sup> )                                 | 25.756                                                                                 | 25.894                                                                                 | 31.515                                               | 22.181                                                                                 | 22.302                                                                                 | 20.892                                                                                 | 20.937                                                                                 | 20.709                                                             |
| Wavelength (Å)                                        | 0.71073                                                                                | 0.71073                                                                                | 0.71073                                              | 0.71073                                                                                | 0.71073                                                                                | 0.71073                                                                                | 0.71073                                                                                | 0.71073                                                            |
| Number of data meas.                                  | 6811                                                                                   | 14387                                                                                  | 10108                                                | 8107                                                                                   | 104048                                                                                 | 13637                                                                                  | 15012                                                                                  | 5225                                                               |
| Number of data with I > 2σ(I)                         | 3257 [R(int) = 0.0612]                                                                 | 3178 [R(int) = 0.0831]                                                                 | 2658                                                 | 3700 [R(int) = 0.0460]                                                                 | 3807 [R(int) = 0.0774]                                                                 | 4470 [R(int) = 0.0605]                                                                 | 4032 [R(int) = 0.0704]                                                                 | 1772 [R(int) = 0.0797]                                             |
| R (%)                                                 | R1 = 0.0459, wR2 = 0.0953                                                              | R1 = 0.0349, wR2 = 0.0692                                                              | R1 = 0.0499, wR2 = 0.1291                            | 0.0328, wR2 = 0.0695                                                                   | R1 = 0.0165, wR2 = 0.0360                                                              | R1 = 0.0412, wR2 = 0.0998                                                              | R1 = 0.0410, wR2 = 0.0965                                                              | R1 = 0.0486, wR2 = 0.1123                                          |
| Rw (%)                                                | R1 = 0.0548, wR2 = 0.0980                                                              | R1 = 0.0402, wR2 = 0.0707                                                              | R1 = 0.0734, wR2 = 0.1506                            | 0.0399, wR2 = 0.0720                                                                   | R1 = 0.0181, wR2 = 0.0363                                                              | R1 = 0.0493, wR2 = 0.1026                                                              | R1 = 0.0513, wR2 = 0.1004                                                              | R1 = 0.0682, wR2 = 0.1227                                          |
| GOF                                                   | 1.057                                                                                  | 0.921                                                                                  | 0.871                                                | 0.935                                                                                  | 1.308                                                                                  | 1.080                                                                                  | 1.031                                                                                  | 1.095                                                              |
| Flack                                                 | 0.013(17)                                                                              | 0.017(10)                                                                              | -                                                    | -0.011(10)                                                                             | 0.023(4)                                                                               | 0.000(10)                                                                              | -0.001(10)                                                                             | -                                                                  |
| Largest peak in final difference (e Å <sup>-3</sup> ) | 1.843 and -1.869                                                                       | 2.015 and -2.608                                                                       | 1.982 and 2.638                                      | 2.054 and -1.855                                                                       | 1.273 and -0.562                                                                       | 2.507 and -2.409                                                                       | 2.235 and -1.816                                                                       | 2.721 and -2.607                                                   |

**Table S1.** Crystallographic data for (S)-BuA-PbBr<sub>3</sub>, (R)-BuA-PbBr<sub>3</sub>, rac-BuA-PbBr<sub>3</sub>, (S)-MBA-PbBr<sub>3</sub>, (R)-MBA-PbBr<sub>3</sub>, (S)-EBA-PbBr<sub>3</sub>, (R)-EBA-PbBr<sub>3</sub> and rac-EBA-PbBr<sub>3</sub>, measured at 100K

<sup>1</sup> Y. Dang, X. Liu, Y. Sun, J. Song, W. Hu, X. Tao Bulk Chiral Halide Perovskite Single Crystals for Active Circular Dichroism and Circularly Polarized Luminescence *J. Phys. Chem. Lett.* **2020**, *11*, 1689-1696

## X-Ray data

|                    | (S)-BuA-PbBr <sub>3</sub>                                                                                                                       | (R)-BuA-PbBr <sub>3</sub>                                                                                                                                                                                     | rac-BuA-PbBr <sub>3</sub>                                                                                   | (S)-MBA-PbBr <sub>3</sub>                                                         | (R)-MBA-PbBr <sub>3</sub>                                                                       | (S)-EBA-PbBr <sub>3</sub>                                                         | (R)-EBA-PbBr <sub>3</sub>                                                         | rac-EBA-PbBr <sub>3</sub>                            |
|--------------------|-------------------------------------------------------------------------------------------------------------------------------------------------|---------------------------------------------------------------------------------------------------------------------------------------------------------------------------------------------------------------|-------------------------------------------------------------------------------------------------------------|-----------------------------------------------------------------------------------|-------------------------------------------------------------------------------------------------|-----------------------------------------------------------------------------------|-----------------------------------------------------------------------------------|------------------------------------------------------|
|                    | 2167654                                                                                                                                         | 2167649                                                                                                                                                                                                       | 2167653                                                                                                     | 2167650                                                                           | 2167652                                                                                         | 2167655                                                                           | 2167656                                                                           | 2167651                                              |
| $d_{\text{Pb-Br}}$ | 2.8461(15)<br>2.9297(13)<br>2.9715(15)<br>3.0751(15)<br>3.1378(12)<br>3.2448(15)                                                                | 2.8404(10)<br>2.9262(10)<br>2.9652(10)<br>3.0662(9)<br>3.1317(9)<br>3.2382(10)                                                                                                                                | 2.8320(11)<br>2.9197(11)<br>2.9840(10)<br>3.0622(10)<br>3.1495(11)<br>3.2726(12)                            | 2.8528(10)<br>2.8894(11)<br>2.9762(11)<br>3.0647(11)<br>3.2495(12)<br>3.3161(12)  | 2.8483(5)<br>2.8839(5)<br>2.9703(5)<br>3.0579(5)<br>3.2428(5)<br>3.3093(6)                      | 2.8153(12)<br>2.8575(12)<br>2.9875(12)<br>3.0817(12)<br>3.3265(12)<br>3.4549(13)  | 2.8156(14)<br>2.8563(13)<br>2.9857(12)<br>3.0810(12)<br>3.3269(13)<br>3.4500(14)  | 2.8387(17)<br>2.9218(11)<br>3.1699(12)<br>3.2905(17) |
| Br-Pb-Br           | 79.87(4)<br>81.08(3)<br>81.48(4)<br>81.59(4)<br>83.34(4)<br>87.48(4)<br>90.50(4)<br>90.44(4)<br>90.98(4)<br>107.69(4)<br>165.32(4)<br>170.72(3) | 76.92(3)<br>79.92(3)<br>80.50(2)<br>81.05(2)<br>81.54(3)<br>81.57(3)<br>83.29(3)<br>87.59(3)<br>90.50(3)<br>90.40(3)<br>90.98(3)<br>95.13(3)<br>107.66(3)<br>113.60(3)<br>165.40(3)<br>166.00(2)<br>170.79(2) | 79.73(3)<br>80.79(3)<br>83.30(3)<br>88.27(3)<br>90.24(3)<br>90.68(3)<br>107.65(3)<br>165.35(3)<br>171.53(2) | 82.56(3)<br>82.68(2)<br>84.19(3)<br>87.84(3)<br>88.15(3)<br>93.77(3)<br>166.59(3) | 82.552(13)<br>82.699(11)<br>84.195(13)<br>87.826(13)<br>88.161(13)<br>93.758(13)<br>166.595(10) | 82.06(3)<br>85.98(3)<br>86.18(3)<br>89.87(3)<br>90.04(4)<br>92.23(3)<br>168.06(3) | 81.97(4)<br>85.96(3)<br>86.21(4)<br>89.82(3)<br>90.06(4)<br>92.31(4)<br>167.99(3) | 88.19(4)<br>91.32(5)                                 |
| $d_{\text{N-Br}}$  | 3.4460(13)<br>3.4782(15)<br>3.4892(14)<br>3.5278(15)<br>3.6354(13)                                                                              | 3.4499(10)<br>3.4780(11)<br>3.4989(11)<br>3.5135(10)<br>3.6474(11)                                                                                                                                            | 3.4752(11)<br>3.4853(10)<br>3.4909(11)<br>3.5151(10)<br>3.6568(12)                                          | 3.4127(10)<br>3.4143(12)<br>3.5008(11)<br>3.5119(12)<br>3.5220(10)                | 3.4082(6)<br>3.4126(6)<br>3.4926(6)<br>3.5078(6)<br>3.5165(6)                                   | 3.3940(13)<br>3.4629(11)<br>3.4752(10)<br>3.5067(11)<br>3.6526(12)                | 3.3938(12)<br>3.4620(13)<br>3.4927(12)<br>3.4984(11)<br>3.6653(13)                | 3.4480(14)<br>3.5153(12)                             |

**Table S2.** Main distances (standard deviation in parentheses) measured for (S)-BuA-PbBr<sub>3</sub>, (R)-BuA-PbBr<sub>3</sub>, rac-BuA-PbBr<sub>3</sub>, (S)-MBA-PbBr<sub>3</sub>, (R)-MBA-PbBr<sub>3</sub>, (S)-EBA-PbBr<sub>3</sub>, (R)-EBA-PbBr<sub>3</sub> and rac-EBA-PbBr<sub>3</sub>

## SHAPE program analysis<sup>2</sup>

Deviation considering 6-coordinated Pb  
(CShM, Continuous Shape Measures)

|                        | ( <i>S</i> )-BuA-PbBr <sub>3</sub> | ( <i>R</i> )-BuA-PbBr <sub>3</sub> | <i>rac</i> -BuA-PbBr <sub>3</sub> | ( <i>S</i> )-MBA-PbBr <sub>3</sub> | ( <i>R</i> )-MBA-PbBr <sub>3</sub> | ( <i>S</i> )-EBA-PbBr <sub>3</sub> | ( <i>R</i> )-EBA-PbBr <sub>3</sub> | <i>rac</i> -EBA-PbBr <sub>3</sub> |
|------------------------|------------------------------------|------------------------------------|-----------------------------------|------------------------------------|------------------------------------|------------------------------------|------------------------------------|-----------------------------------|
| Deviation from Oh CShM | 14.099                             | 14.083                             | 14.013                            | 18.382                             | 18.382                             | 19.070                             | 19.058                             | 18.148                            |

Deviation considering 5-coordinated Pb

|                         | ( <i>S</i> )-BuA-PbBr <sub>3</sub> | ( <i>R</i> )-BuA-PbBr <sub>3</sub> | <i>rac</i> -BuA-PbBr <sub>3</sub> | ( <i>S</i> )-MBA-PbBr <sub>3</sub> | ( <i>R</i> )-MBA-PbBr <sub>3</sub> | ( <i>S</i> )-EBA-PbBr <sub>3</sub> | ( <i>R</i> )-EBA-PbBr <sub>3</sub> | <i>rac</i> -EBA-PbBr <sub>3</sub> |
|-------------------------|------------------------------------|------------------------------------|-----------------------------------|------------------------------------|------------------------------------|------------------------------------|------------------------------------|-----------------------------------|
| Deviation from C4v CShM | 12.015                             | 12.010                             | 11.897                            | 8.352                              | 8.354                              | 8.470                              | 8.470                              | 8.574                             |
| Deviation from D3h CShM | 18.813                             | 18.812                             | 18.746                            | 19.708                             | 19.706                             | 19.737                             | 19.737                             | 19.998                            |

## PL emission parameters as a function of octahedral distortion

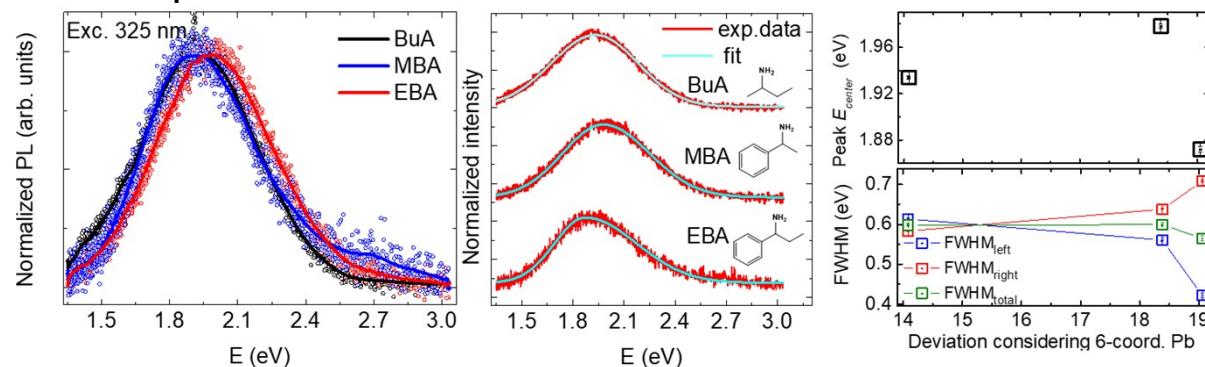

**Figure S6:** Left: PL spectra recorded using 3.81 eV excitation for (*R*)-BuA-PbBr<sub>3</sub>, (*R*)-MBA-PbBr<sub>3</sub>, (*R*)-EBA-PbBr<sub>3</sub> (points: experimental data, lines: smoothed spectra), middle: bi-gaussian fitting of the PL peaks, right: peak center position and FWHMs extracted from the fit as a function of the octahedral distortion determined using a PbBr<sub>6</sub> O<sub>h</sub> model.

## Time-resolved photoluminescence

Time-resolved PL studies were performed of the broadband emission for the (*R*)-BuA-PbBr<sub>3</sub> and (*rac*)-BuA-PbBr<sub>3</sub> samples, using 3.06 eV (405 nm) ps excitation and recording the PL decays as a function of detection wavelength. The Time-Correlated Single Photon Counting

2 a) M. Lluell, D. Casanova, J. Girera, P. Alemany, S. Alvarez, SHAPE, version 2.1, Universitat de Barcelona, Barcelona, Spain ; b) S. Alvarez, P. Alemany, D. Casanova, J. Cirera, M. Lluell, D. Avnir, Shape maps and polyhedral interconversion paths in transition metal chemistry, *Coord. Chem. Rev.*, 2005, **249**, 1693-1708.

measurements were performed in ambient conditions in a micro-PL setup in backscattering configuration. An avalanche photodiode was placed behind the exit slit of a monochromator used to filter the signal spectrally. The measurements were performed at 5 MHz laser repetition rate.

We observe a variation of the PL lifetime with detection energy for energies within the broad PL band (Fig. S7, S8). The PL decays show a multiexponential character which for the shortest time range can be well approximated by a biexponential with time constants in the ns range. The relative contribution of the shorter time decreases with decreasing emission energy and the transients are longer for the racemic compound. The short and long-time components obtained from the biexponential fits in the 0-10 ns range are 0.18 ns and 1.5 ns for the (*R*)-**BuA**-PbBr<sub>3</sub> sample and 0.43 ns and 3.59 ns for (rac)-**BuA**-PbBr<sub>3</sub>, respectively. A similar biexponential character and increase of the lifetimes for lower emission energies has been previously observed for white light emitting thin 2 HOIP films and its observation was attributed to the presence of two different bands, originating from excitons trapped at different sites and characterized by different lifetimes.<sup>3</sup> Longer lifetimes for an achiral racemic PbBr based perovskite as compared to R,S enantiomers have been reported previously for a chiral **MPA** based HOIP<sup>4</sup> and explained by a lower energy barrier between the STE and FE state in the racemic compound, as well as a lower concentration of defects contributing to nonradiative losses .<sup>4,5</sup>

3 A. Yangui, D. Garrot, J. S. Lauret, A. Lussion, G. Bouchez, E. Deleporte, S. Pillet, E. E. Bendeif, M. Castro, S. Triki, Y. Abid, K. Boukheddaden, Optical Investigation of Broadband White-Light Emission in Self-Assembled Organic-Inorganic Perovskite (C<sub>6</sub>H<sub>11</sub>NH<sub>3</sub>)<sub>2</sub>PbBr<sub>4</sub>, *J. Phys. Chem. C*, **2015**, 119, 23638-23647.

4 Y. Liu, C. Wang, Y. Guo, L. Ma, C. Zhou, Y. Liu, L. Zhu, X. Li, M. Zhang, G. Zhao New lead bromide chiral perovskites with ultra-broadband white-light emission, *J. Mater. Chem. C*, **2020**, 8, 5673-5680.

5 Z. Zhang, W.-H. Fang, M. V. Tokina, R. Long, and O. V. Prezhdo, 'Rapid Decoherence Suppresses Charge Recombination in Multi-Layer 2D Halide Perovskites: Time-Domain Ab Initio Analysis', *Nano Lett.*, vol. 18, no. 4, pp. 2459–2466, Apr. 2018, doi: 10.1021/acs.nanolett.8b00035



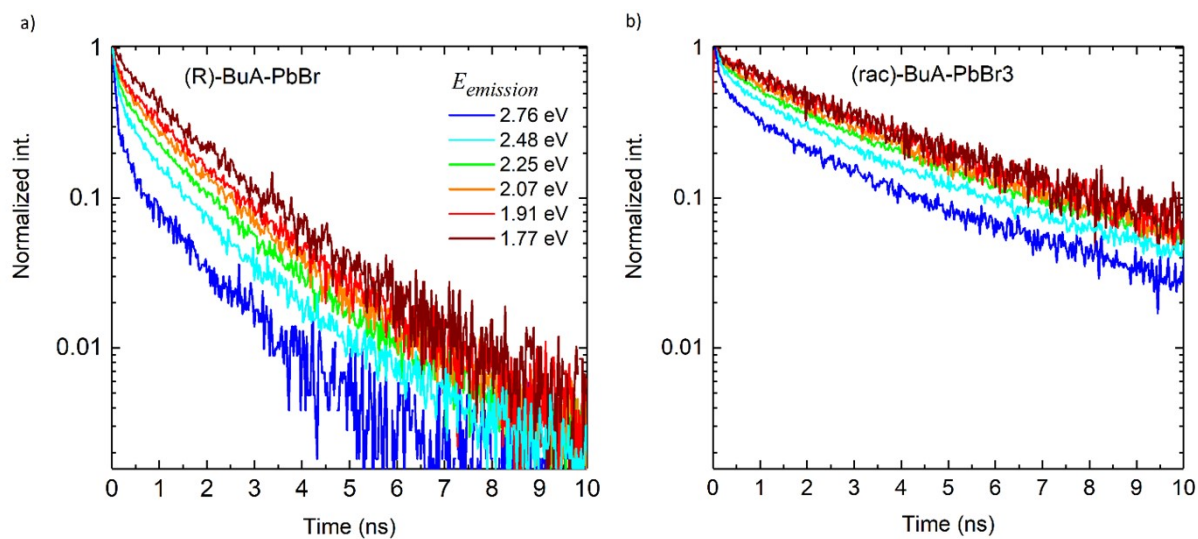

**Figure S7:** Time-resolved photoluminescence decays for 405 nm excitation and varying detection energy for a) (R)-BuA-PbBr<sub>3</sub> and b) (rac)-BuA-PbBr<sub>3</sub> in the short time range.

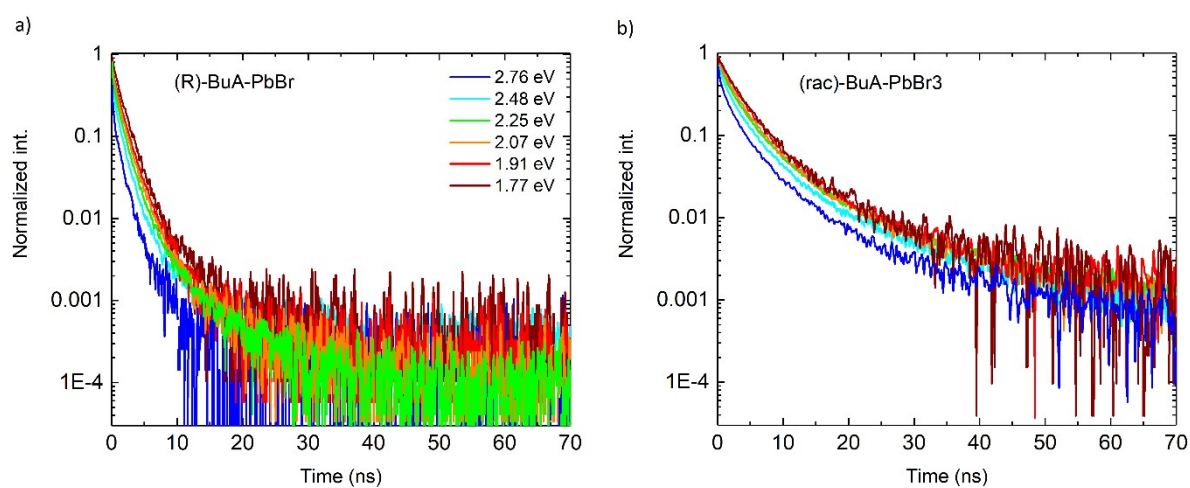

**Figure S8:** Time-resolved photoluminescence decays at 405 nm excitation for different detection energy for a) (R)-BuA-PbBr<sub>3</sub> and b) (rac)-BuA-PbBr<sub>3</sub> in the full recorded time range.

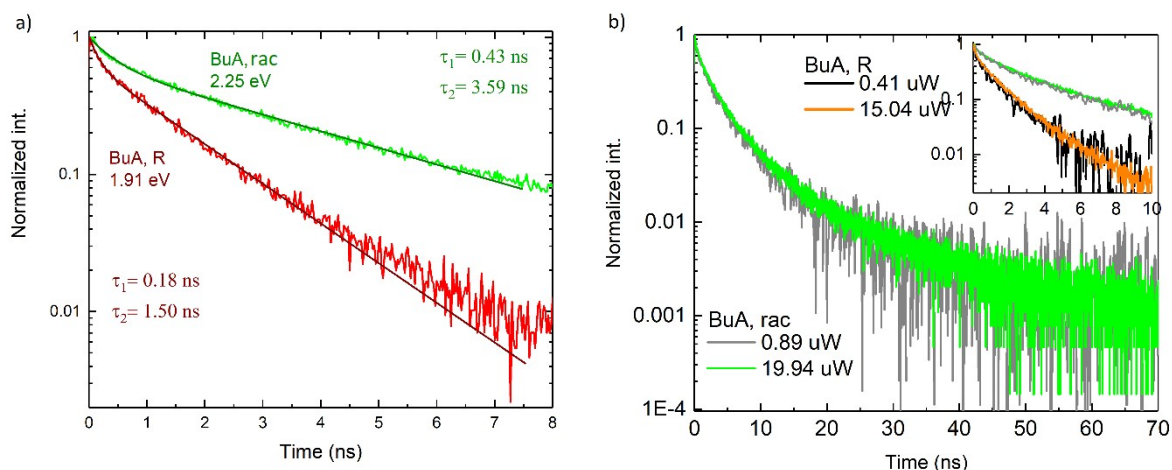

**Figure S9:** a) Biexponential fits of the decay curves recorded for the emission energy corresponding to the PL peak maximum for each compound at short times. The short and long-time components obtained from the biexponential fits in the 0-10 ns range are 0.18 ns and 1.5 ns for the (*R*)-**BuA**-PbBr<sub>3</sub> sample and 0.43 ns and 3.59 ns for (*rac*)-**BuA**-PbBr<sub>3</sub>. b) Comparison of decay curves recorded for the emission energy corresponding to the PL peak maximum for both compounds at highest and lowest measured excitation power. Data is shown in the full time range only for sample (*R*)-**BuA**-PbBr<sub>3</sub>, which has a significantly longer lifetime, for better clarity. The dynamics observed at energies corresponding to the maxima of the steady-state emission does not change for the investigated range of excitation powers, suggesting that neither carrier trapping at defects and other non-radiative loss channels nor Auger processes play a significant role in the PL dynamics.
